# Supplementary material for: Study of thermal material properties for Ta- and Al-substituted Li7La3Zr2O12 (LLZO) solid-state electrolyte in dependency of temperature and grain size
Source: Royal Society of Chemistry journal article supplement (doi:10.1039/d2ta00323f), 2022-01-01
Supplement: d2ta00323f1.pdf [file d2ta00323f1.pdf]

## Supporting Information for Journal of Materials Chemistry A

### Study of Thermal Material Parameters for Ta and Al Substituted $\text{Li}_7\text{La}_3\text{Zr}_2\text{O}_{12}$ (LLZO) Solid State Electrolyte in Dependency of Temperature and Grain Size

Julian Neises,<sup>a,\*</sup> Walter Sebastian Scheld,<sup>b</sup> Ah-Ram Seok,<sup>b</sup> Sandra Lobe,<sup>b</sup> Martin Finsterbusch,<sup>b,c</sup> Sven Uhlenbruck,<sup>b,c</sup> Roland Schmechel,<sup>a</sup> and Niels Benson<sup>a,\*</sup>

<sup>a</sup> Institute of Technology for Nanostructures (NST), University Duisburg-Essen, 47057 Duisburg, Germany.

<sup>b</sup> Institute of Energy and Climate Research – Materials Synthesis and Processing (IEK-1), Forschungszentrum Juelich GmbH, 52425 Jülich, Germany

<sup>c</sup> Helmholtz Institute Muenster, Wilhelm-Johnen Str., 52425 Juelich, Germany

\* Corresponding authors

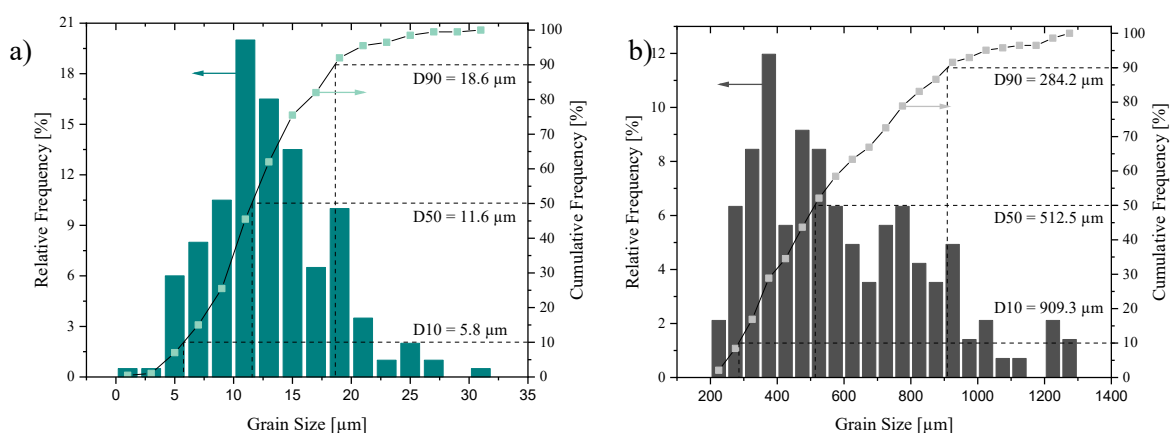

Fig. S1: Relative and cumulative grain size distribution with indicated D10, D50 and D90 percentile values of a) LLZO:Ta and b) LLZO:Al.

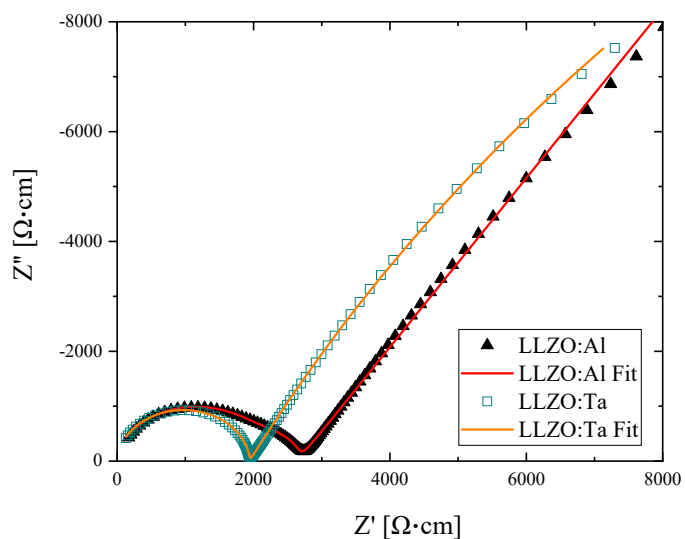

Fig. S2: Nyquist plot for LLZO:Ta and LLZO:Al. Data are normalized to the ratio of sample thickness to sample area.

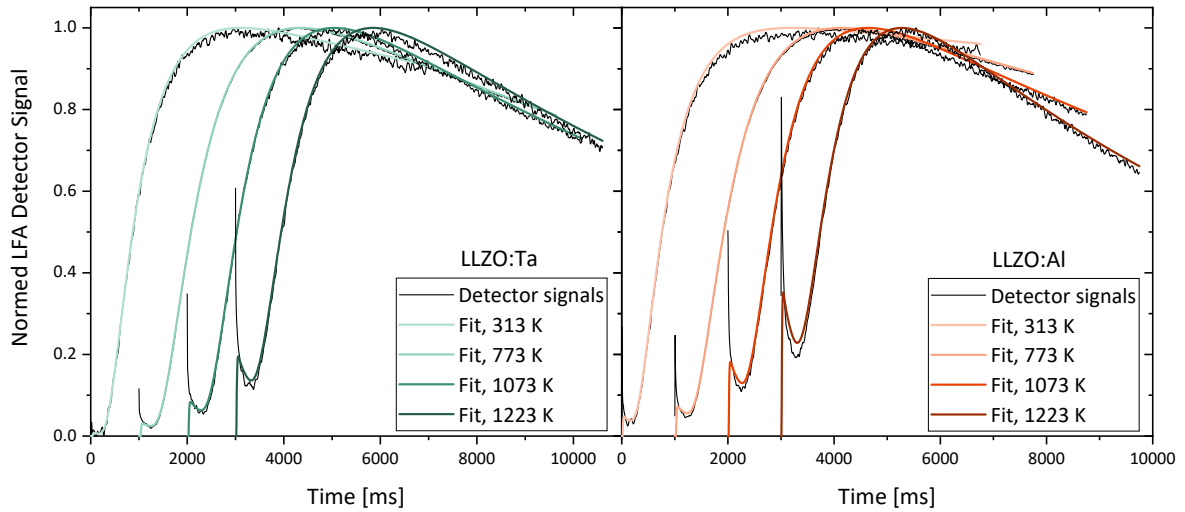

**Fig. S3:** Normed laser flash detector signals with corresponding fits (transparent (radiation) model<sup>35</sup>) for LLZO:Ta (left) and LLZO:Al (right) at 313 K, 773 K, 1073 K, and 1223 K. The signals at 773 K, 1073 K, and 1223 K are each shown with a time offset of 1000 ms for better clarity.

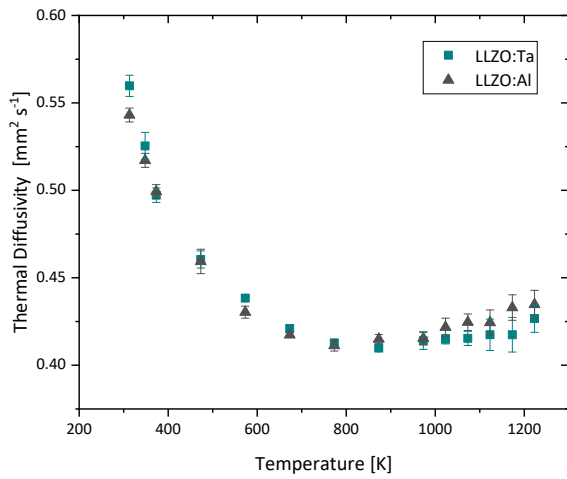

**Fig. S4:** Temperature-dependent thermal diffusivity of LLZO:Ta and LLZO:Al (both porosity corrected) determined by laser flash analysis under Ar/H<sub>2</sub> atmosphere. The shown data are the mean of five measurements with standard deviation shown as error bars.

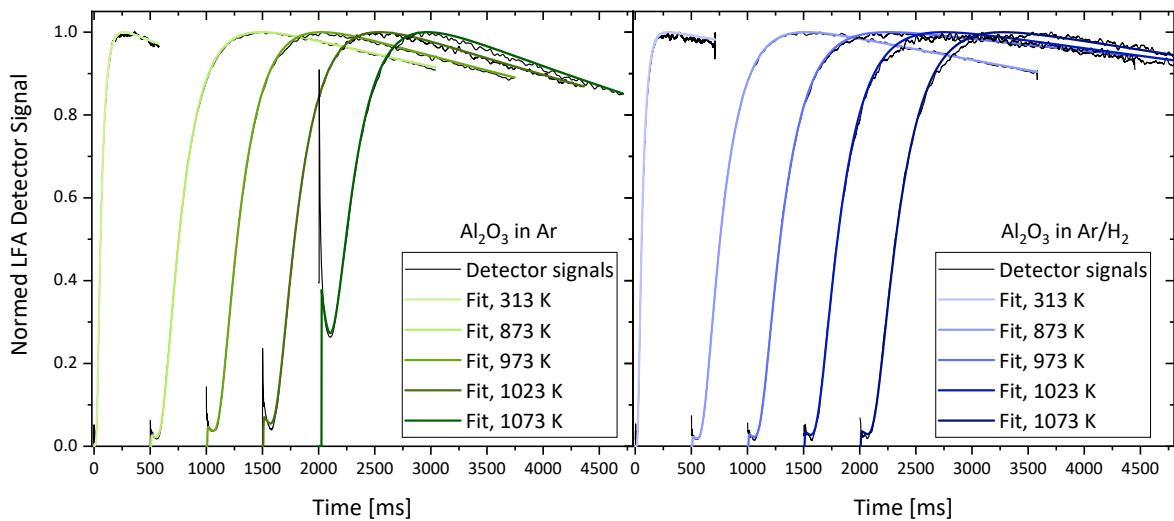

**Fig. S5:** Normed laser flash detector signals with corresponding fits (transparent (radiation) model<sup>35</sup>) for an Al<sub>2</sub>O<sub>3</sub> reference sample under Ar-atmosphere (left) and Ar/H<sub>2</sub>-atmosphere (right) at 313 K, 873 K, 973 K, 1023 K, and 1073 K. The signals at 873 K, 973 K, 1023 K, and 1073 K are each shown with a time offset of 500 ms for better clarity.

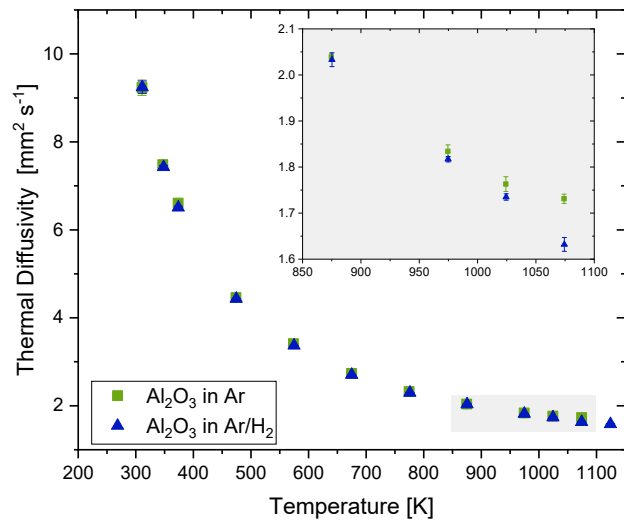

**Fig. S6:** Temperature-dependent thermal diffusivity of an Al<sub>2</sub>O<sub>3</sub> reference sample determined by laser flash analysis under Ar and Ar/H<sub>2</sub> atmosphere. The shown data are the mean of three measurements with standard deviation shown as error bars. Inset: Closeup to the temperature range between 850 and 1100 K.
